# Supplementary material
Source: PubMed Central journal article supplement (PMC5585022)

### Global Cognition (37-MMSE)

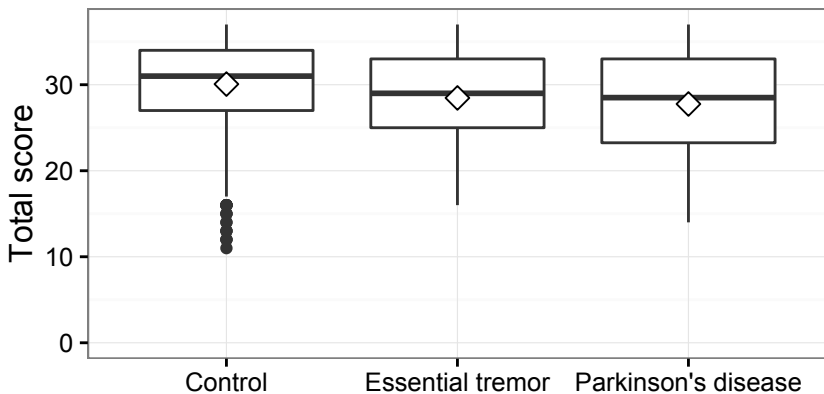

### Memory (Six Object Delayed Recall)

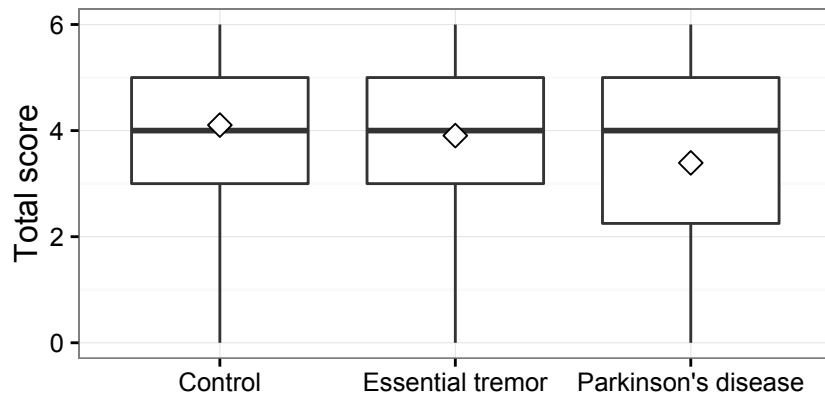

### Memory (Story Delayed Recall)

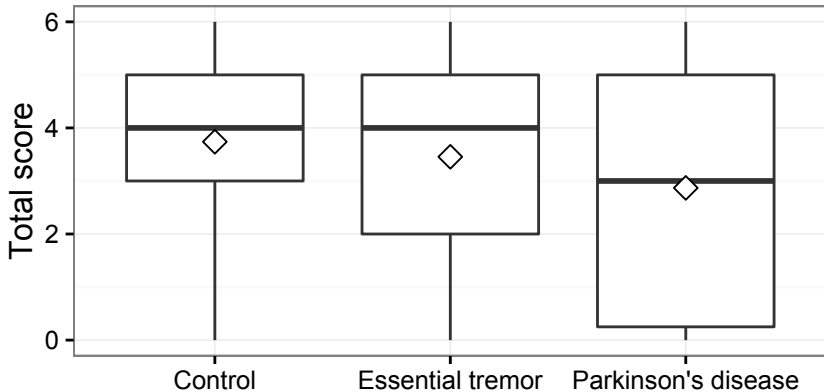

### Verbal fluency (Number of Animals)

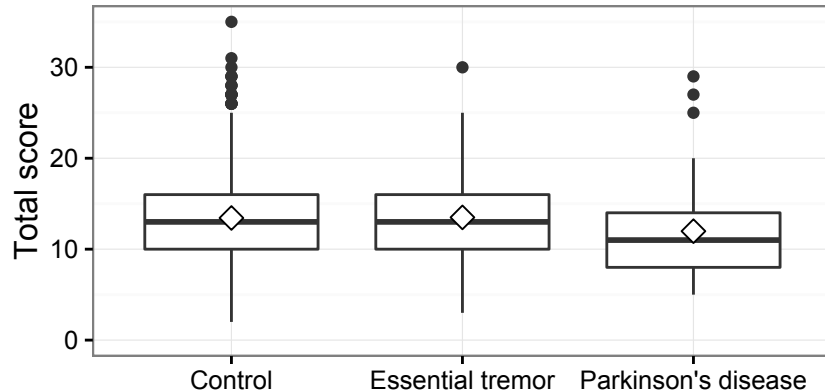

### Verbal fluency (Number of Fruits)

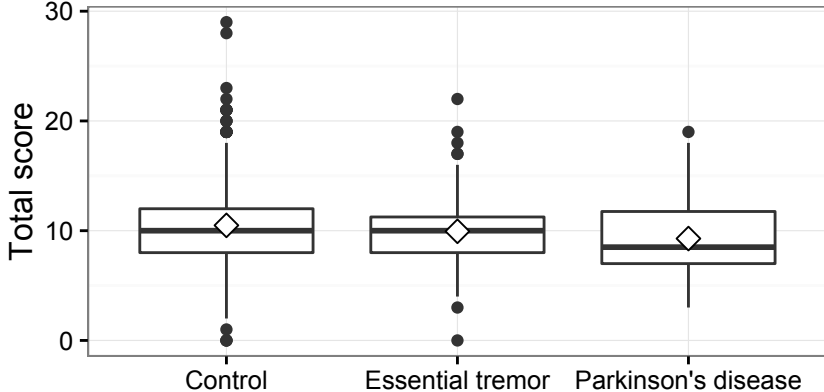

### Cognitive speed (Trail Making Test A errors)

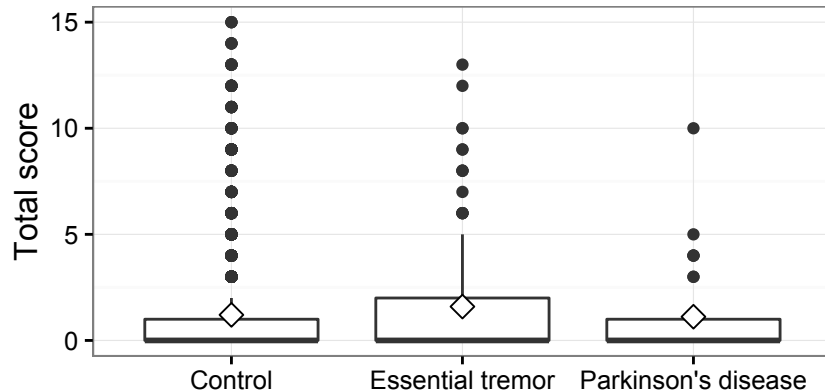

Supplement: NIHMS852305-supplement-Supp_Fig_S1.pdf [file NIHMS852305-supplement-Supp_Fig_S1.pdf]
